# Supplementary material for: Endothelial Progenitor Cells Carrying Monocyte Markers Are Selectively Abnormal in Type 1 Diabetic Patients With Early Retinopathy
Source: PubMed Central journal article supplement — Diabetes. 2012 Mar 14;61(4):908–14. doi: 10.2337/db11-1197 (PMC3314367; doi:10.2337/db11-1197), 2012-03-14
Supplement: supp_db11-1197_DB111197SupplementaryData.pdf [file supp_db11-1197_DB111197SupplementaryData.pdf]

SUPPLEMENTARY DATA

**Supplementary Table 1.** Sequence of primers used for RealTime PCR quantitation of CXCR4, CXCR2, CD45, and CD14 expression in the colonies formed by CFU-Hill cells.

|         |         | Sequence (5' → 3')     | Position | Accession #  |
|---------|---------|------------------------|----------|--------------|
| CXCR4   | Forward | GGCCTTATCCTGCCTGGTA    | 935-1101 | NM_001008540 |
|         | Reverse | TCGATGCTGATCCCAATGT    |          |              |
| CXCR2   | Forward | CAACCTTGAGGCACAGTGAA   | 85-227   | NM_001168298 |
|         | Reverse | CTTCAAAGCTGTCACCTCTCCA |          |              |
| CD45    | Forward | TTCATGCAGCTAGCAAGTGG   | 52-219   | NM_002838    |
|         | Reverse | CAAAGCCAAATGCCAAGAGT   |          |              |
| CD14    | Forward | GCCGCTGTGTAGGAAAGAAG   | 197-346  | NM_001174105 |
|         | Reverse | ACAAGGTTCTGGCGTGGTC    |          |              |
| β-Actin | Forward | TGACCCAGATCATGTTTGAGA  | 440-596  | NM_001101    |
|         | Reverse | AGGGCATACCCCTCGTAGAT   |          |              |
